# Supplementary material
Source: MDPI journal article supplement (https://www.mdpi.com/2411-5142/8/2/77)
Supplement: s1 [file s1]

**Functional evaluation questionnaire S1: Knee Society  
Score (KSS) questionnaire**

## KNEE SOCIETY SCORE: PRE-OP

### DEMOGRAPHIC INFORMATION (To be completed by patient)

**1- Today's date** /  / Enter dates as:  
mm/dd/yyyy**2- Date of birth** /  / **3- Height (ft' in")** **4- Weight (lbs.)** **5- Sex**☐ Male ☐ Female**6- Side of this (symptomatic) knee**☐ Left ☐ RightIf both knees will be operated on, please  
use a different form for each knee**7- Ethnicity**

☐ Native Hawaiian or other Pacific Islander ☐ American Indian or Alaska Native ☐ Hispanic or Latino  
☐ Arab or Middle Eastern ☐ African American or Black ☐ Asian ☐ White

**8- Please indicate the expected date and surgeon for your knee replacement operation****Date** /  / Enter dates as:  
mm/dd/yyyy**Name of Surgeon****9- Will this be a primary or revision knee replacement?**☐ Primary ☐ Revision**To be completed by surgeon****10- Charnley Functional Classification (Use Code Below)**

A Unilateral Knee Arthritis

C1 TKR, but remote arthritis affecting ambulation

B1 Unilateral TKA, opposite knee arthritic

C2 TKR, but medical condition affecting ambulation

B2 Bilateral TKA

C3 Unilateral or Bilateral TKA with Unilateral or Bilateral THR

**OBJECTIVE KNEE INDICATORS**

(To be completed by surgeon)

**ALIGNMENT****1- Alignment: measured on AP standing Xray (Anatomic Alignment)****25 point max**

Neutral: 2-10 degrees valgus (25 pts)  
 Varus: < 2 degrees valgus (-10 pts)  
 Valgus: > 10 degrees valgus (-10 pts)

**INSTABILITY****2- Medial / Lateral Instability: measured in full extension****15 point max**

None (15 pts)  
 Little or < 5 mm (10 pts)  
 Moderate or 5 mm (5 pts)  
 Severe or > 5 mm (0 pts)

**3- Anterior / Posterior Instability: measured at 90 degrees****10 point max**

None (10 pts)  
 Moderate < 5 mm (5 pts)  
 Severe > 5 mm (0 pts)

**JOINT MOTION****4- Range of motion (1 point for each 5 degrees)**

**Deductions****Flexion Contracture**

1-5 degrees (-2 pts)  
 6-10 degrees (-5 pts)  
 11-15 degrees (-10 pts)  
 > 15 degrees (-15 pts)

**Minus Points**

**Extensor Lag**

<10 degrees (-5 pts)  
 10-20 degrees (-10 pts)  
 > 20 degrees (-15 pts)

**Minus Points**

**SYMPTOMS**

(To be completed by patient)

**1- Pain with level walking****(10 - Score)**

|   |   |   |   |   |   |   |   |   |   |    |
|---|---|---|---|---|---|---|---|---|---|----|
| 0 | 1 | 2 | 3 | 4 | 5 | 6 | 7 | 8 | 9 | 10 |
|---|---|---|---|---|---|---|---|---|---|----|

none

severe

**2- Pain with stairs or inclines****(10 - Score)**

|   |   |   |   |   |   |   |   |   |   |    |
|---|---|---|---|---|---|---|---|---|---|----|
| 0 | 1 | 2 | 3 | 4 | 5 | 6 | 7 | 8 | 9 | 10 |
|---|---|---|---|---|---|---|---|---|---|----|

none

severe

**3- Does this knee feel "normal" to you?****(5 points)**
☐ Always (5 pts)    ☐ Sometimes (3 pts)    ☐ Never (0 pts)

**Maximum total points (25 points)**

**PATIENT SATISFACTION****1- Currently, how satisfied are you with the pain level of your knee while sitting?****(8 points)**
☐ Very Satisfied (8 pts)    ☐ Satisfied (6 pts)    ☐ Neutral (4 pts)    ☐ Dissatisfied (2 pts)    ☐ Very Dissatisfied (0 pts)
**2- Currently, how satisfied are you with the pain level of your knee while lying in bed?****(8 points)**
☐ Very Satisfied (8 pts)    ☐ Satisfied (6 pts)    ☐ Neutral (4 pts)    ☐ Dissatisfied (2 pts)    ☐ Very Dissatisfied (0 pts)
**3- Currently, how satisfied are you with your knee function while getting out of bed?****(8 points)**
☐ Very Satisfied (8 pts)    ☐ Satisfied (6 pts)    ☐ Neutral (4 pts)    ☐ Dissatisfied (2 pts)    ☐ Very Dissatisfied (0 pts)
**4- Currently, how satisfied are you with your knee function while performing light household duties?****(8 points)**
☐ Very Satisfied (8 pts)    ☐ Satisfied (6 pts)    ☐ Neutral (4 pts)    ☐ Dissatisfied (2 pts)    ☐ Very Dissatisfied (0 pts)
**5- Currently, how satisfied are you with your knee function while performing leisure recreational activities?****(8 points)**
☐ Very Satisfied (8 pts)    ☐ Satisfied (6 pts)    ☐ Neutral (4 pts)    ☐ Dissatisfied (2 pts)    ☐ Very Dissatisfied (0 pts)
**Maximum total points (40 points)**

**PATIENT EXPECTATIONS** (To be completed by patient)**What do you expect to accomplish with your knee replacement:****1- Do you expect your knee joint replacement surgery will relieve your knee pain? (5 points)**

- ☐ no, not at all (1 pt)
- ☐ yes, a little bit (2 pts)
- ☐ yes, somewhat (3 pts)
- ☐ yes, a moderate amount (4 pts)
- ☐ yes, a lot (5 pts)

**2- Do you expect your surgery will help you carry out your normal activities of daily living? (5 points)**

- ☐ no, not at all (1 pt)
- ☐ yes, a little bit (2 pts)
- ☐ yes, somewhat (3 pts)
- ☐ yes, a moderate amount (4 pts)
- ☐ yes, a lot (5 pts)

**3- Do you expect you surgery will help you perform leisure, recreational or sports activities? (5 points)**

- ☐ no, not at all (1 pt)
- ☐ yes, a little bit (2 pts)
- ☐ yes, somewhat (3 pts)
- ☐ yes, a moderate amount (4 pts)
- ☐ yes, a lot (5 pts)

**Maximum total points (15 points)**

### WALKING AND STANDING (30 points)

**(0 points)**

**(-10 points)**

11

[illegible]

**(0 points)**

**(15 points)**

|  |  |
|--|--|
|  |  |
|--|--|

**(15 points)**

11

|  |  |
|--|--|
|  |  |
|--|--|

**STANDARD ACTIVITIES (30 points)**

How much does your knee bother you during each of the following activities?

| no<br>bother | slight | moderate | severe | very<br>severe | cannot do<br>(because<br>of knee) | I never<br>do this |
|--------------|--------|----------|--------|----------------|-----------------------------------|--------------------|
| 5            | 4      | 3        | 2      | 1              | 0                                 |                    |

1 - Walking on an uneven surface

|                       |                       |                       |                       |                       |                       |                       |
|-----------------------|-----------------------|-----------------------|-----------------------|-----------------------|-----------------------|-----------------------|
| <input type="radio"/> |
|-----------------------|-----------------------|-----------------------|-----------------------|-----------------------|-----------------------|-----------------------|

2 - Turning or pivoting on your leg

|                       |                       |                       |                       |                       |                       |                       |
|-----------------------|-----------------------|-----------------------|-----------------------|-----------------------|-----------------------|-----------------------|
| <input type="radio"/> |
|-----------------------|-----------------------|-----------------------|-----------------------|-----------------------|-----------------------|-----------------------|

3 - Climbing up or down a flight of stairs

|                       |                       |                       |                       |                       |                       |                       |
|-----------------------|-----------------------|-----------------------|-----------------------|-----------------------|-----------------------|-----------------------|
| <input type="radio"/> |
|-----------------------|-----------------------|-----------------------|-----------------------|-----------------------|-----------------------|-----------------------|

4 - Getting up from a low couch or a chair without arms

|                       |                       |                       |                       |                       |                       |                       |
|-----------------------|-----------------------|-----------------------|-----------------------|-----------------------|-----------------------|-----------------------|
| <input type="radio"/> |
|-----------------------|-----------------------|-----------------------|-----------------------|-----------------------|-----------------------|-----------------------|

5 - Getting into or out of a car

|                       |                       |                       |                       |                       |                       |                       |
|-----------------------|-----------------------|-----------------------|-----------------------|-----------------------|-----------------------|-----------------------|
| <input type="radio"/> |
|-----------------------|-----------------------|-----------------------|-----------------------|-----------------------|-----------------------|-----------------------|

6 - Moving laterally (stepping to the side)

|                       |                       |                       |                       |                       |                       |                       |
|-----------------------|-----------------------|-----------------------|-----------------------|-----------------------|-----------------------|-----------------------|
| <input type="radio"/> |
|-----------------------|-----------------------|-----------------------|-----------------------|-----------------------|-----------------------|-----------------------|

**Maximum points (30 points)**

**ADVANCED ACTIVITIES (25 points)**

1 - Climbing a ladder or step stool

|                       |                       |                       |                       |                       |                       |                       |
|-----------------------|-----------------------|-----------------------|-----------------------|-----------------------|-----------------------|-----------------------|
| <input type="radio"/> |
|-----------------------|-----------------------|-----------------------|-----------------------|-----------------------|-----------------------|-----------------------|

2 - Carrying a shopping bag for a block

|                       |                       |                       |                       |                       |                       |                       |
|-----------------------|-----------------------|-----------------------|-----------------------|-----------------------|-----------------------|-----------------------|
| <input type="radio"/> |
|-----------------------|-----------------------|-----------------------|-----------------------|-----------------------|-----------------------|-----------------------|

3 - Squatting

|                       |                       |                       |                       |                       |                       |                       |
|-----------------------|-----------------------|-----------------------|-----------------------|-----------------------|-----------------------|-----------------------|
| <input type="radio"/> |
|-----------------------|-----------------------|-----------------------|-----------------------|-----------------------|-----------------------|-----------------------|

4 - Kneeling

|                       |                       |                       |                       |                       |                       |                       |
|-----------------------|-----------------------|-----------------------|-----------------------|-----------------------|-----------------------|-----------------------|
| <input type="radio"/> |
|-----------------------|-----------------------|-----------------------|-----------------------|-----------------------|-----------------------|-----------------------|

5 - Running

|                       |                       |                       |                       |                       |                       |                       |
|-----------------------|-----------------------|-----------------------|-----------------------|-----------------------|-----------------------|-----------------------|
| <input type="radio"/> |
|-----------------------|-----------------------|-----------------------|-----------------------|-----------------------|-----------------------|-----------------------|

**Maximum points (25 points)**

**DISCRETIONARY KNEE ACTIVITIES (15 points)**

Please check 3 of the activities below that you consider *most important to you*.

(Please do not write in additional activities)

**Recreational Activities**

- ☐ Swimming
- ☐ Golfing (18 holes)
- ☐ Road Cycling (>30mins)
- ☐ Gardening
- ☐ Bowling
- ☐ Racquet Sports (Tennis, Racquetball, etc.)
- ☐ Distance Walking
- ☐ Dancing / Ballet
- ☐ Stretching Exercises (stretching out your muscles)

**Workout and Gym Activities**

- ☐ Weight-lifting
- ☐ Leg Extensions
- ☐ Stair-Climber
- ☐ Stationary Biking / Spinning
- ☐ Leg Press
- ☐ Jogging
- ☐ Elliptical Trainer
- ☐ Aerobic Exercises

Please copy all 3 checked activities into the empty boxes below.

How much does your knee bother you during each of these activities?

| Activity<br>(Please write the 3 activities<br>from list above) | no<br>bother<br>5     | slight<br>4           | moderate<br>3         | severe<br>2           | very<br>severe<br>1   | cannot do<br>(because<br>of knee)<br>0 |                      |
|----------------------------------------------------------------|-----------------------|-----------------------|-----------------------|-----------------------|-----------------------|----------------------------------------|----------------------|
| 1. <input type="text"/>                                        | <input type="radio"/>                  | <input type="text"/> |
| 2. <input type="text"/>                                        | <input type="radio"/>                  | <input type="text"/> |
| 3. <input type="text"/>                                        | <input type="radio"/>                  | <input type="text"/> |
| <b>Maximum points (15 points)</b>                              |                       |                       |                       |                       |                       |                                        | <input type="text"/> |

**Maximum total points (100 points)**



## **Generic QoL evaluation questionnaire S2: EQ-5D-5L questionnaire**

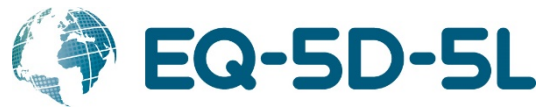

## **Health Questionnaire**

**English version for the UK**

Under each heading, please tick the ONE box that best describes your health TODAY.

### **MOBILITY**

- I have no problems in walking about ☐
- I have slight problems in walking about ☐
- I have moderate problems in walking about ☐
- I have severe problems in walking about ☐
- I am unable to walk about ☐

### **SELF-CARE**

- I have no problems washing or dressing myself ☐
- I have slight problems washing or dressing myself ☐
- I have moderate problems washing or dressing myself ☐
- I have severe problems washing or dressing myself ☐
- I am unable to wash or dress myself ☐

### **USUAL ACTIVITIES** (e.g. work, study, housework, family or leisure activities)

- I have no problems doing my usual activities ☐
- I have slight problems doing my usual activities ☐
- I have moderate problems doing my usual activities ☐
- I have severe problems doing my usual activities ☐
- I am unable to do my usual activities ☐

### **PAIN / DISCOMFORT**

- I have no pain or discomfort ☐
- I have slight pain or discomfort ☐
- I have moderate pain or discomfort ☐
- I have severe pain or discomfort ☐
- I have extreme pain or discomfort ☐

### **ANXIETY / DEPRESSION**

- I am not anxious or depressed ☐
- I am slightly anxious or depressed ☐
- I am moderately anxious or depressed ☐
- I am severely anxious or depressed ☐
- I am extremely anxious or depressed ☐

- We would like to know how good or bad your health is TODAY.
- This scale is numbered from 0 to 100.
- 100 means the best health you can imagine.  
0 means the worst health you can imagine.
- Please mark an X on the scale to indicate how your health is TODAY.
- Now, write the number you marked on the scale in the box below.

YOUR HEALTH TODAY =

The best health  
you can imagine

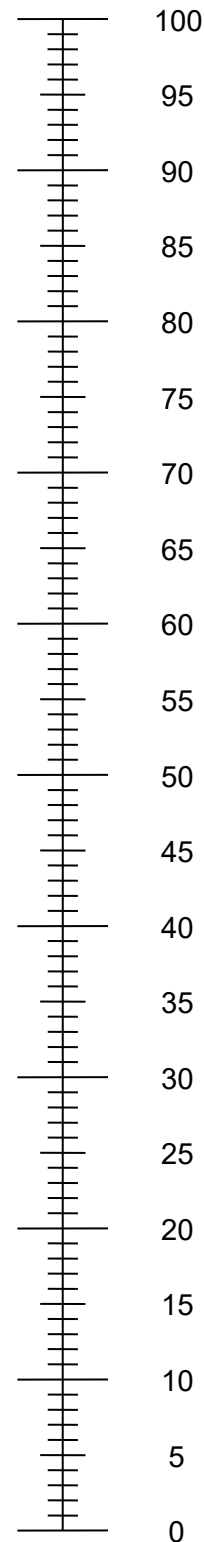

The worst health  
you can imagine

**Knee osteoarthritis-specific QoL evaluation questionnaire**  
**S3: Knee Injury and Osteoarthritis Outcome Score**  
**(KOOS)**

# Knee Injury and Osteoarthritis Outcome Score (KOOS)

---

Source: Roos EM, Roos HP, Lohmander LS, Ekdahl C, Beynnon BD. Knee Injury and Osteoarthritis Outcome Score (KOOS)--development of a self-administered outcome measure. *J Orthop Sports Phys Ther*. 1998 Aug;28(2):88-96.

The Knee Injury and Osteoarthritis Outcome Score (KOOS) is a questionnaire designed to assess short and long-term patient-relevant outcomes following knee injury. The KOOS is self-administered and assesses five outcomes: pain, symptoms, activities of daily living, sport and recreation function, and knee-related quality of life. The KOOS meets basic criteria of outcome measures and can be used to evaluate the course of knee injury and treatment outcome. KOOS is patient-administered, the format is user-friendly and it takes about 10 minutes to fill out.

## Scoring instructions

The KOOS's five patient-relevant dimensions are scored separately: Pain (nine items); Symptoms (seven items); ADL Function (17 items); Sport and Recreation Function (five items); Quality of Life (four items). A Likert scale is used and all items have five possible answer options scored from 0 (No problems) to 4 (Extreme problems) and each of the five scores is calculated as the sum of the items included.

## Interpretation of scores

Scores are transformed to a 0–100 scale, with zero representing extreme knee problems and 100 representing no knee problems as common in orthopaedic scales and generic measures. Scores between 0 and 100 represent the percentage of total possible score achieved.

## Knee Injury and Osteoarthritis Outcome Score (KOOS)

### Pain

|                                    |                                |                                  |                                 |                                |                                 |
|------------------------------------|--------------------------------|----------------------------------|---------------------------------|--------------------------------|---------------------------------|
| P1 How often is your knee painful? | <input type="checkbox"/> Never | <input type="checkbox"/> Monthly | <input type="checkbox"/> Weekly | <input type="checkbox"/> Daily | <input type="checkbox"/> Always |
|------------------------------------|--------------------------------|----------------------------------|---------------------------------|--------------------------------|---------------------------------|

What degree of pain have you experienced the last week when...?

|                                   |                               |                               |                                   |                                 |                                  |
|-----------------------------------|-------------------------------|-------------------------------|-----------------------------------|---------------------------------|----------------------------------|
| P2 Twisting/pivoting on your knee | <input type="checkbox"/> None | <input type="checkbox"/> Mild | <input type="checkbox"/> Moderate | <input type="checkbox"/> Severe | <input type="checkbox"/> Extreme |
| P3 Straightening knee fully       | <input type="checkbox"/> None | <input type="checkbox"/> Mild | <input type="checkbox"/> Moderate | <input type="checkbox"/> Severe | <input type="checkbox"/> Extreme |
| P4 Bending knee fully             | <input type="checkbox"/> None | <input type="checkbox"/> Mild | <input type="checkbox"/> Moderate | <input type="checkbox"/> Severe | <input type="checkbox"/> Extreme |
| P5 Walking on flat surface        | <input type="checkbox"/> None | <input type="checkbox"/> Mild | <input type="checkbox"/> Moderate | <input type="checkbox"/> Severe | <input type="checkbox"/> Extreme |
| P6 Going up or down stairs        | <input type="checkbox"/> None | <input type="checkbox"/> Mild | <input type="checkbox"/> Moderate | <input type="checkbox"/> Severe | <input type="checkbox"/> Extreme |
| P7 At night while in bed          | <input type="checkbox"/> None | <input type="checkbox"/> Mild | <input type="checkbox"/> Moderate | <input type="checkbox"/> Severe | <input type="checkbox"/> Extreme |
| P8 Sitting or lying               | <input type="checkbox"/> None | <input type="checkbox"/> Mild | <input type="checkbox"/> Moderate | <input type="checkbox"/> Severe | <input type="checkbox"/> Extreme |
| P9 Standing upright               | <input type="checkbox"/> None | <input type="checkbox"/> Mild | <input type="checkbox"/> Moderate | <input type="checkbox"/> Severe | <input type="checkbox"/> Extreme |

### Symptoms

|                                                                                          |                                 |                                 |                                    |                                 |                                  |
|------------------------------------------------------------------------------------------|---------------------------------|---------------------------------|------------------------------------|---------------------------------|----------------------------------|
| Sy1 How severe is your knee stiffness after first wakening in the morning?               | <input type="checkbox"/> None   | <input type="checkbox"/> Mild   | <input type="checkbox"/> Moderate  | <input type="checkbox"/> Severe | <input type="checkbox"/> Extreme |
| Sy2 How severe is your knee stiffness after sitting, lying, or resting later in the day? | <input type="checkbox"/> None   | <input type="checkbox"/> Mild   | <input type="checkbox"/> Moderate  | <input type="checkbox"/> Severe | <input type="checkbox"/> Extreme |
| Sy3 Do you have swelling in your knee?                                                   | <input type="checkbox"/> Never  | <input type="checkbox"/> Rarely | <input type="checkbox"/> Sometimes | <input type="checkbox"/> Often  | <input type="checkbox"/> Always  |
| Sy4 Do you feel grinding, hear clicking or any other type of noise when your knee moves? | <input type="checkbox"/> Never  | <input type="checkbox"/> Rarely | <input type="checkbox"/> Sometimes | <input type="checkbox"/> Often  | <input type="checkbox"/> Always  |
| Sy5 Does your knee catch or hang up when moving?                                         | <input type="checkbox"/> Never  | <input type="checkbox"/> Rarely | <input type="checkbox"/> Sometimes | <input type="checkbox"/> Often  | <input type="checkbox"/> Always  |
| Sy6 Can you straighten your knee fully?                                                  | <input type="checkbox"/> Always | <input type="checkbox"/> Often  | <input type="checkbox"/> Sometimes | <input type="checkbox"/> Rarely | <input type="checkbox"/> Never   |
| Sy7 Can you bend your knee fully?                                                        | <input type="checkbox"/> Always | <input type="checkbox"/> Often  | <input type="checkbox"/> Sometimes | <input type="checkbox"/> Rarely | <input type="checkbox"/> Never   |

## Activities of daily living

What difficulty have you experienced the last week...?

|                                                               |                               |                               |                                   |                                 |                                  |
|---------------------------------------------------------------|-------------------------------|-------------------------------|-----------------------------------|---------------------------------|----------------------------------|
| A1 Descending                                                 | <input type="checkbox"/> None | <input type="checkbox"/> Mild | <input type="checkbox"/> Moderate | <input type="checkbox"/> Severe | <input type="checkbox"/> Extreme |
| A2 Ascending stairs                                           | <input type="checkbox"/> None | <input type="checkbox"/> Mild | <input type="checkbox"/> Moderate | <input type="checkbox"/> Severe | <input type="checkbox"/> Extreme |
| A3 Rising from sitting                                        | <input type="checkbox"/> None | <input type="checkbox"/> Mild | <input type="checkbox"/> Moderate | <input type="checkbox"/> Severe | <input type="checkbox"/> Extreme |
| A4 Standing                                                   | <input type="checkbox"/> None | <input type="checkbox"/> Mild | <input type="checkbox"/> Moderate | <input type="checkbox"/> Severe | <input type="checkbox"/> Extreme |
| A5 Bending to floor/picking up an object                      | <input type="checkbox"/> None | <input type="checkbox"/> Mild | <input type="checkbox"/> Moderate | <input type="checkbox"/> Severe | <input type="checkbox"/> Extreme |
| A6 Walking on flat surface                                    | <input type="checkbox"/> None | <input type="checkbox"/> Mild | <input type="checkbox"/> Moderate | <input type="checkbox"/> Severe | <input type="checkbox"/> Extreme |
| A7 Getting in/out of car                                      | <input type="checkbox"/> None | <input type="checkbox"/> Mild | <input type="checkbox"/> Moderate | <input type="checkbox"/> Severe | <input type="checkbox"/> Extreme |
| A8 Going shopping                                             | <input type="checkbox"/> None | <input type="checkbox"/> Mild | <input type="checkbox"/> Moderate | <input type="checkbox"/> Severe | <input type="checkbox"/> Extreme |
| A9 Putting on socks/stockings                                 | <input type="checkbox"/> None | <input type="checkbox"/> Mild | <input type="checkbox"/> Moderate | <input type="checkbox"/> Severe | <input type="checkbox"/> Extreme |
| A10 Rising from bed                                           | <input type="checkbox"/> None | <input type="checkbox"/> Mild | <input type="checkbox"/> Moderate | <input type="checkbox"/> Severe | <input type="checkbox"/> Extreme |
| A11 Taking off socks/stockings                                | <input type="checkbox"/> None | <input type="checkbox"/> Mild | <input type="checkbox"/> Moderate | <input type="checkbox"/> Severe | <input type="checkbox"/> Extreme |
| A12 Lying in bed (turning over, maintaining knee position)    | <input type="checkbox"/> None | <input type="checkbox"/> Mild | <input type="checkbox"/> Moderate | <input type="checkbox"/> Severe | <input type="checkbox"/> Extreme |
| A13 Getting in/out of bath                                    | <input type="checkbox"/> None | <input type="checkbox"/> Mild | <input type="checkbox"/> Moderate | <input type="checkbox"/> Severe | <input type="checkbox"/> Extreme |
| A14 Sitting                                                   | <input type="checkbox"/> None | <input type="checkbox"/> Mild | <input type="checkbox"/> Moderate | <input type="checkbox"/> Severe | <input type="checkbox"/> Extreme |
| A15 Getting on/off toilet                                     | <input type="checkbox"/> None | <input type="checkbox"/> Mild | <input type="checkbox"/> Moderate | <input type="checkbox"/> Severe | <input type="checkbox"/> Extreme |
| A16 Heavy domestic duties (shovelling, scrubbing floors, etc) | <input type="checkbox"/> None | <input type="checkbox"/> Mild | <input type="checkbox"/> Moderate | <input type="checkbox"/> Severe | <input type="checkbox"/> Extreme |
| A17 Light domestic duties (cooking, dusting, etc)             | <input type="checkbox"/> None | <input type="checkbox"/> Mild | <input type="checkbox"/> Moderate | <input type="checkbox"/> Severe | <input type="checkbox"/> Extreme |

## Sport and recreation function

What difficulty have you experienced the last week...?

|                                           |                               |                               |                                   |                                 |                                  |
|-------------------------------------------|-------------------------------|-------------------------------|-----------------------------------|---------------------------------|----------------------------------|
| Sp1 Squatting                             | <input type="checkbox"/> None | <input type="checkbox"/> Mild | <input type="checkbox"/> Moderate | <input type="checkbox"/> Severe | <input type="checkbox"/> Extreme |
| Sp2 Running                               | <input type="checkbox"/> None | <input type="checkbox"/> Mild | <input type="checkbox"/> Moderate | <input type="checkbox"/> Severe | <input type="checkbox"/> Extreme |
| Sp3 Jumping                               | <input type="checkbox"/> None | <input type="checkbox"/> Mild | <input type="checkbox"/> Moderate | <input type="checkbox"/> Severe | <input type="checkbox"/> Extreme |
| Sp4 Turning/twisting on your injured knee | <input type="checkbox"/> None | <input type="checkbox"/> Mild | <input type="checkbox"/> Moderate | <input type="checkbox"/> Severe | <input type="checkbox"/> Extreme |
| Sp5 Kneeling                              | <input type="checkbox"/> None | <input type="checkbox"/> Mild | <input type="checkbox"/> Moderate | <input type="checkbox"/> Severe | <input type="checkbox"/> Extreme |



**Knee-related quality of life**

|    |                                                                                         |                                     |                                  |                                     |                                   |                                  |
|----|-----------------------------------------------------------------------------------------|-------------------------------------|----------------------------------|-------------------------------------|-----------------------------------|----------------------------------|
| Q1 | How often are you aware of your knee problems?                                          | <input type="checkbox"/> Never      | <input type="checkbox"/> Monthly | <input type="checkbox"/> Weekly     | <input type="checkbox"/> Daily    | <input type="checkbox"/> Always  |
| Q2 | Have you modified your lifestyle to avoid potentially damaging activities to your knee? | <input type="checkbox"/> Not at all | <input type="checkbox"/> Mildly  | <input type="checkbox"/> Moderately | <input type="checkbox"/> Severely | <input type="checkbox"/> Totally |
| Q3 | How troubled are you with lack of confidence in your knee?                              | <input type="checkbox"/> Not at all | <input type="checkbox"/> Mildly  | <input type="checkbox"/> Moderately | <input type="checkbox"/> Severely | <input type="checkbox"/> Totally |
| Q4 | In general, how much difficulty do you have with your knee?                             | <input type="checkbox"/> None       | <input type="checkbox"/> Mild    | <input type="checkbox"/> Moderate   | <input type="checkbox"/> Severe   | <input type="checkbox"/> Extreme |
